# Supplementary material for: Microencapsulation of Salmonella-Specific Bacteriophage Felix O1 Using Spray-Drying in a pH-Responsive Formulation and Direct Compression Tableting of Powders into a Solid Oral Dosage Form
Source: Pharmaceuticals (Basel). 2019 Mar 22;12(1):43. doi: 10.3390/ph12010043 (PMC6469172; doi:10.3390/ph12010043)
Supplement: Supplementary file 1 [file pharmaceuticals-12-00043-s001.pdf]

## Supplementary Information

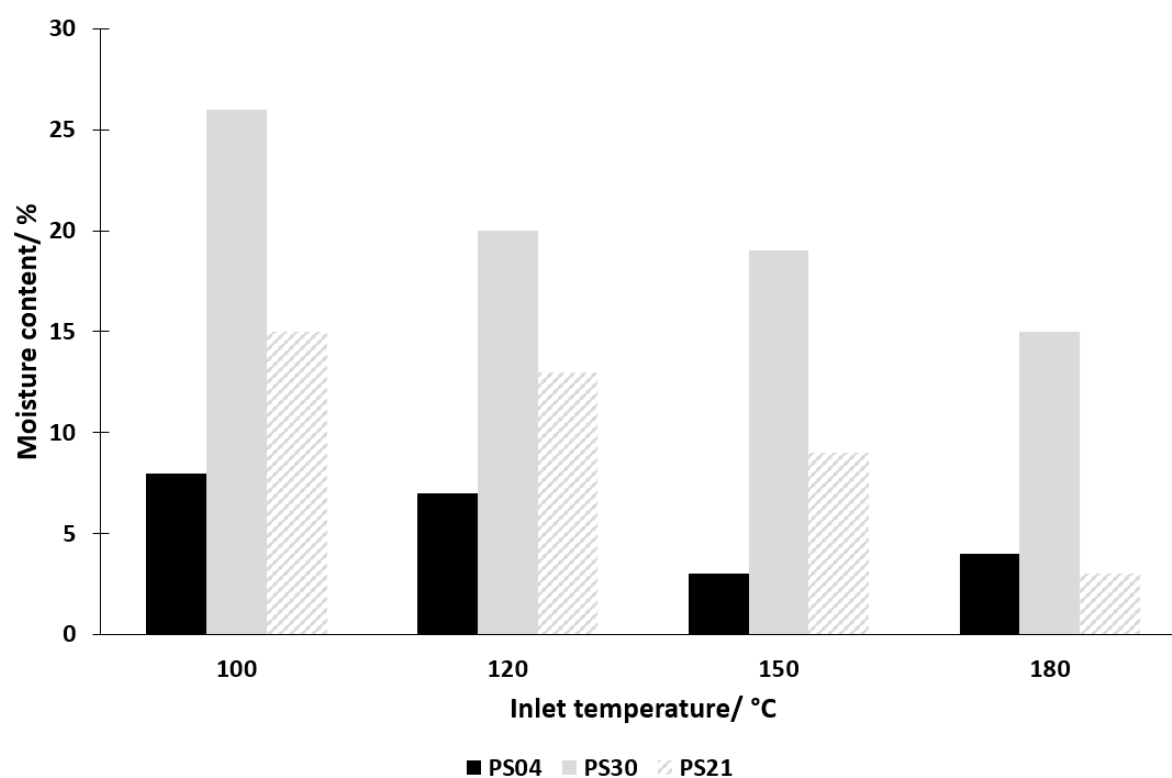

**Figure S1.** Moisture content of spray dried powders at different drying temperatures. All measurements were done in triplicate.

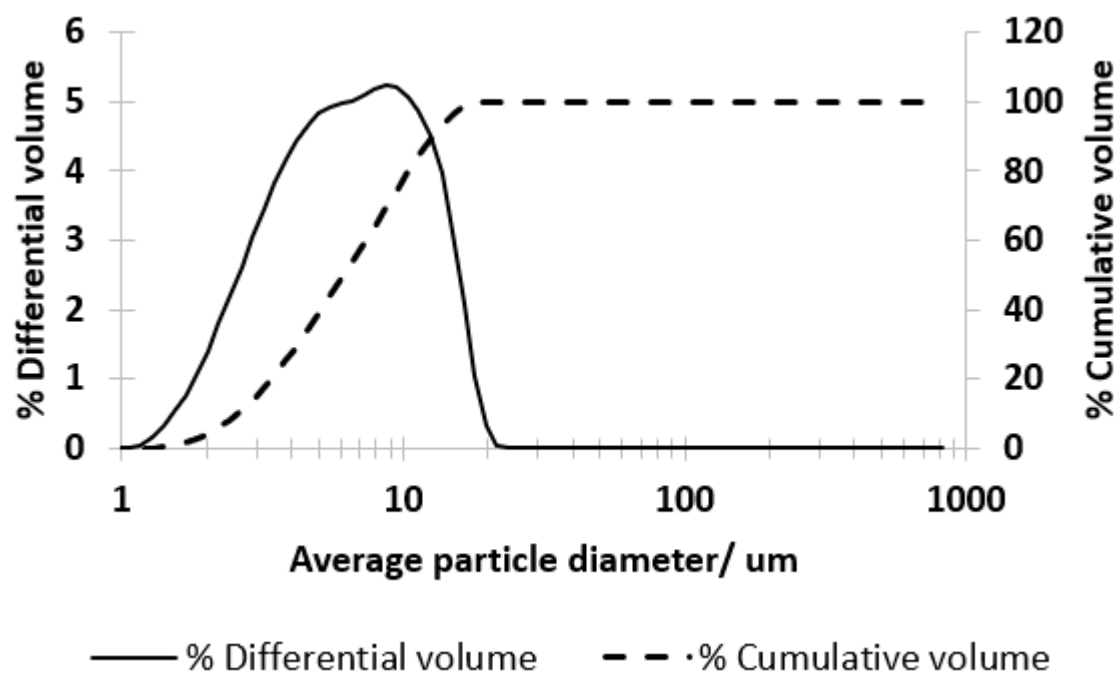

**Figure S2.** Coulter particle size distribution measurements for PS21 spray dried powder using inlet temperature 150°C. Differential volume distribution of particles (solid line), cumulative volume distribution (dashed line). Measurements were done in triplicate.

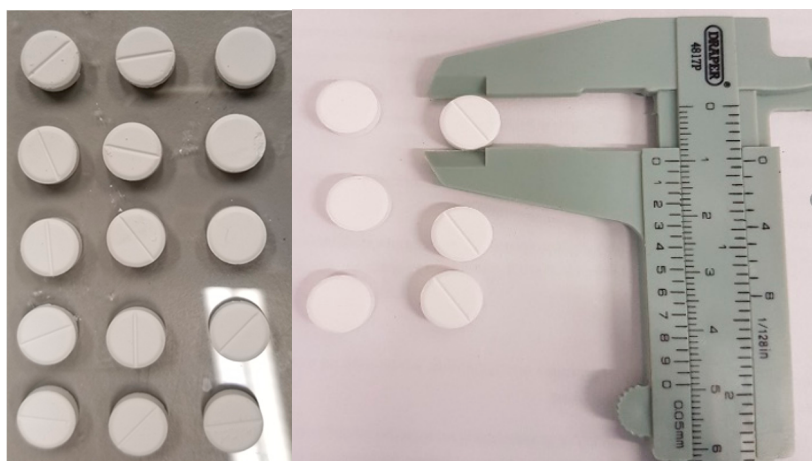

**Figure S3.** Images of tablets produced using the process of direct compression on spray dried powders PS21.

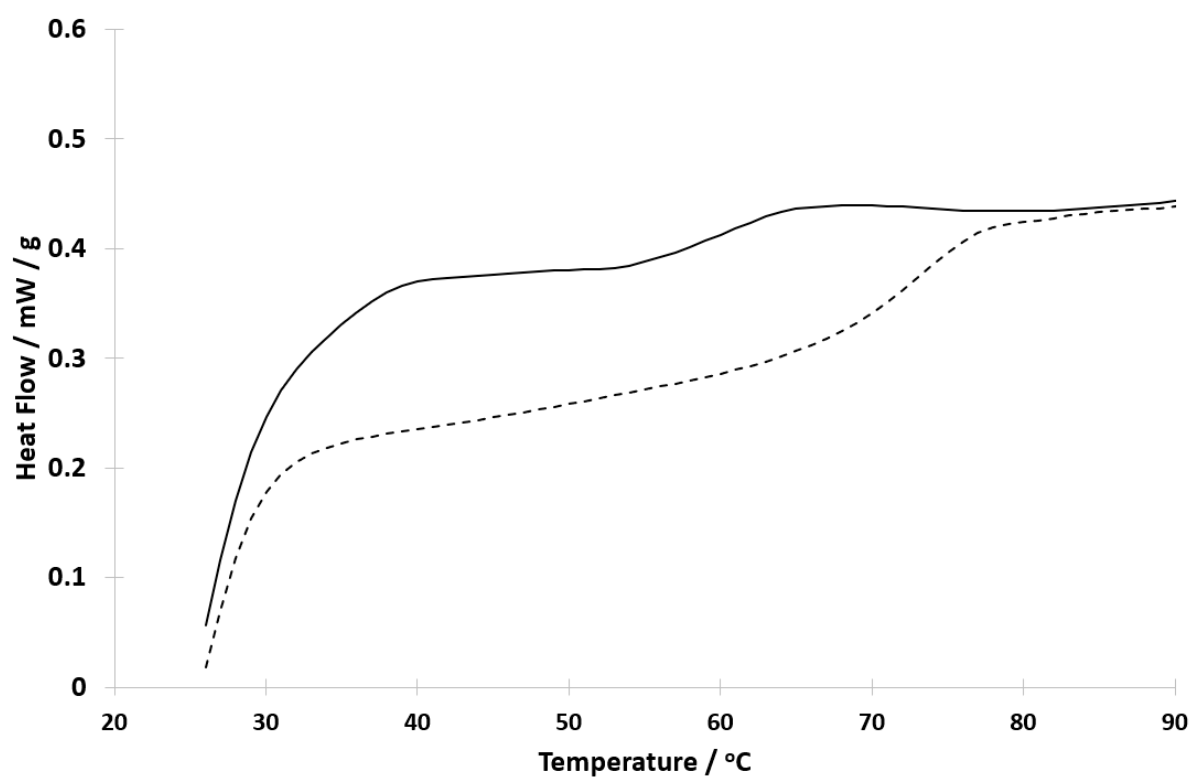

**Figure S4.** Differential Scanning Calorimetry of spray dried trehalose powders spray dried trehalose powders (PS04) showing the effect of spray drying inlet temperature 120 °C (solid line) and 150 °C (dashed line), on glass transition temperature.
